# Supplementary material
Source: publisher site journal article supplement (https://www.dovepress.com/article/282326)
Supplement: Supplementary file 1 [file get_supplementary_file.php]

### Supplementary Table A1

We have corrected the sphere and astigmatism powers of distance in all subjects in this study. However, we have not defined the range of distance refractive correction power and astigmatism power. The amount of astigmatism could affect the results of this study. Accordingly, we have shown the background and refractive details of all subjects.

Supplementary Table A1. Background and Refractive Details of all Subjects

| Patient No | Gender | Age | Group | Right Eye                        |                  |                    |          |                    |                         | Left Eye                         |                  |                    |          |                    |                         |
|------------|--------|-----|-------|----------------------------------|------------------|--------------------|----------|--------------------|-------------------------|----------------------------------|------------------|--------------------|----------|--------------------|-------------------------|
|            |        |     |       | Distance visual acuity (log MAR) | Sphere power (D) | Cylinder power (D) | Axis (°) | Addition power (D) | Pupillary distance (mm) | Distance visual acuity (log MAR) | Sphere power (D) | Cylinder power (D) | Axis (°) | Addition power (D) | Pupillary distance (mm) |
| 1          | Male   | 69  | 1     | 0                                | +1.50            | -1.50              | 90       | 2.50               | 32.5                    | -0.08                            | -0.25            | 0                  |          | 2.50               | 33.0                    |
| 2          | Female | 69  | 2     | -0.08                            | +1.25            | 0                  |          | 2.50               | 32.0                    | -0.08                            | +1.25            | 0                  |          | 2.50               | 32.0                    |
| 3          | Male   | 67  | 2     | 0                                | -1.25            | -2.50              | 10       | 2.25               | 34.0                    | -0.08                            | -0.50            | -2.50              | 165      | 2.25               | 34.5                    |
| 4          | Male   | 71  | 2     | 0                                | +0.25            | -1.25              | 80       | 2.50               | 30.0                    | 0                                | -0.25            | -1.00              | 130      | 2.50               | 30.0                    |
| 5          | Female | 77  | 1     | -0.08                            | +0.50            | -0.50              | 145      | 2.50               | 33.5                    | 0                                | +2.00            | 0                  |          | 2.50               | 33.5                    |
| 6          | Female | 68  | 2     | 0                                | +1.00            | -1.00              | 65       | 2.25               | 32.0                    | 0                                | +1.75            | -1.50              | 110      | 2.25               | 31.0                    |
| 7          | Female | 67  | 1     | -0.08                            | -1.25            | -1.00              | 70       | 2.25               | 32.0                    | -0.08                            | -1.25            | -1.00              | 115      | 2.25               | 32.0                    |
| 8          | Male   | 66  | 2     | 0                                | +1.25            | -0.50              | 75       | 2.25               | 35.0                    | 0                                | +2.50            | -1.00              | 110      | 2.25               | 33.0                    |
| 9          | Female | 59  | 2     | -0.08                            | +0.25            | -0.50              | 90       | 1.75               | 30.0                    | -0.08                            | 0                | -0.25              | 85       | 1.75               | 29.5                    |
| 10         | Male   | 63  | 1     | -0.08                            | +2.25            | -1.00              | 97       | 2.00               | 33.0                    | -0.08                            | +0.50            | -1.00              | 100      | 2.00               | 33.0                    |
| 11         | Female | 67  | 2     | -0.08                            | -2.25            | -1.50              | 20       | 2.00               | 34.5                    | -0.08                            | -2.50            | -1.00              | 140      | 2.00               | 33.5                    |
| 12         | Male   | 76  | 1     | 0                                | 0                | -1.00              | 50       | 2.25               | 31.0                    | -0.08                            | +0.75            | 0                  |          | 2.25               | 29.0                    |
| 13         | Female | 75  | 1     | -0.08                            | +2.00            | -1.25              | 60       | 2.25               | 29.0                    | 0                                | -0.50            | 0                  | 90       | 2.25               | 31.0                    |
| 14         | Male   | 66  | 1     | -0.08                            | +2.50            | -0.50              | 75       | 2.00               | 32.0                    | -0.08                            | +2.50            | -0.50              | 100      | 2.00               | 34.0                    |
| 15         | Female | 69  | 1     | -0.08                            | +1.50            | -1.00              | 45       | 2.25               | 31.5                    | -0.08                            | +1.50            | 0                  |          | 2.25               | 31.5                    |
| 16         | Female | 53  | 2     | -0.08                            | -2.75            | 0                  |          | 1.75               | 31.0                    | 0                                | -2.75            | 0                  |          | 1.75               | 30.0                    |
| 17         | Female | 55  | 1     | -0.08                            | 0                | -1.00              | 165      | 1.75               | 31.0                    | 0                                | -0.25            | -1.00              | 5        | 1.75               | 30.5                    |
| 18         | Female | 61  | 2     | 0                                | +1.25            | -0.75              | 20       | 2.25               | 30.5                    | -0.08                            | +0.75            | -0.75              | 155      | 2.25               | 29.5                    |
| 19         | Female | 63  | 1     | -0.08                            | +0.25            | -1.25              | 80       | 2.00               | 31.5                    | -0.08                            | 0                | -1.00              | 90       | 2.00               | 31.5                    |
| 20         | Female | 50  | 2     | -0.08                            | +0.25            | 0                  |          | 1.50               | 31.0                    | -0.08                            | +0.25            | 0                  |          | 1.50               | 31.0                    |

log MAR: logarithm of the minimum angle of resolution; D: diopter

For Group 1, measurement was performed in the first and second periods wearing the 8- and 4-curve lenses. For Group 2, measurement was performed in the first and second periods wearing the 4- and 8-curve lenses.
